# Supplementary material for: Steering the electron transport properties of pyridine-functionalized fullerene derivatives in inverted perovskite solar cells: the nitrogen site matters
Source: Royal Society of Chemistry journal article supplement (doi:10.1039/c9ta12188a), 2020-01-01
Supplement: c9ta12188a1.pdf [file c9ta12188a1.pdf]

## Electronic Supplemental Information for

### **Steering Electron Transport Properties of Pyridine-Functionalized Fullerene Derivatives in Inverted Perovskite Solar Cells: The Nitrogen Site Matters**

*Bairu Li,<sup>a</sup> Jieming Zhen,<sup>a</sup> Yangyang Wan,<sup>a</sup> Xunyong Lei,<sup>b</sup> Lingbo Jia,<sup>a</sup> Xiaojun Wu,<sup>a</sup> Hualing Zeng,<sup>b</sup> Muqing Chen,<sup>\*a</sup> Guan-Wu Wang,<sup>\*c</sup> and Shangfeng Yang<sup>\*a</sup>*

<sup>a</sup>Hefei National Laboratory for Physical Sciences at Microscale,  
CAS Key Laboratory of Materials for Energy Conversion,  
Department of Materials Science and Engineering,  
Synergetic Innovation Center of Quantum Information & Quantum Physics,  
University of Science and Technology of China,  
Hefei 230026, China  
E-mail: mqchen@ustc.edu.cn; sfyang@ustc.edu.cn

<sup>b</sup>ICQD, Hefei National Laboratory for Physical Sciences at Microscale, CAS Key Laboratory of Strongly-coupled Quantum Matter Physics, University of Science and Technology of China (USTC), Hefei 230026, China

<sup>c</sup>CAS Key Laboratory of Soft Matter Chemistry,  
Hefei National Laboratory for Physical Sciences at Microscale,  
Collaborative Innovation Center of Chemistry for Energy Materials (iChEM),  
Department of Chemistry,  
University of Science and Technology of China,  
Hefei 230026, China  
E-mail: gwang@ustc.edu.cn

## Contents

- S1. MALDI-TOF mass spectra of C<sub>60</sub>-n-Py (n=2, 3, 4).**
- S2. <sup>1</sup>H NMR and <sup>13</sup>C NMR spectra of C<sub>60</sub>-n-Py (n=2, 3, 4).**
- S3. FTIR spectra of C<sub>60</sub>-n-Py (n=2, 3, 4).**
- S4. Crystal parameters of C<sub>60</sub>-n-Py (n=2, 3, 4) obtained by X-ray single crystal diffraction.**
- S5. TGA analysis of C<sub>60</sub>-n-Py (n=2, 3, 4).**
- S6. Estimation of the energy levels of C<sub>60</sub>-n-Py (n=2, 3, 4) and PCBM.**
- S7. Photovoltaic parameters of devices using different C<sub>60</sub>-n-Py (n=2, 3, 4). as ETL deposited with the same procedure.**
- S8. Optimization of the film thickness of C<sub>60</sub>-3-Py, C<sub>60</sub>-4-Py ETL.**
- S9. Statistic photovoltaic parameters for the C<sub>60</sub>-n-Py (n=2, 3, 4) and PCBM-based devices.**
- S10. Photovoltaic parameters of devices with C<sub>60</sub>-n-Py (n=2, 3, 4) ETLs in different scan direction.**
- S11. AFM height images of perovskite films modified by C<sub>60</sub>-n-Py (n=2, 3, 4) and PCBM.**
- S12. Analysis of time-resolved photoluminescence (TRPL) spectra of the perovskite film with C<sub>60</sub>-n-Py (n=2, 3, 4) and PCBM ETLs.**
- S13. Trap state densities of perovskite films with C<sub>60</sub>-n-Py (n=2, 3, 4) and PCBM ETLs measured by SCLC method.**
- S14. Electron mobility of CH<sub>3</sub>NH<sub>3</sub>PbI<sub>3</sub> films with C<sub>60</sub>-n-Py (n=2, 3, 4) and PCBM ETLs estimated by SCLC method.**
- S15. Parameters employed for the fitting of the impedance spectra.**
- S16. Stabilized photocurrent density and power output of the C<sub>60</sub>-n-Py-based (n=2, 3, 4) devices.**
- S17. Wettabilities of C<sub>60</sub>-n-Py (n=2, 3, 4) films.**
- S18. Device fabrication procedure and photovoltaic parameters of the Cs<sub>0.05</sub>FA<sub>0.83</sub>MA<sub>0.12</sub>PbI<sub>2.55</sub>Br<sub>0.45</sub> iPSCs with C<sub>60</sub>-n-Py (n=2, 3, 4) and PCBM ETLs**

**S1. MALDI-TOF mass spectra of  $C_{60}$ - $n$ -Py ( $n=2, 3, 4$ ).**

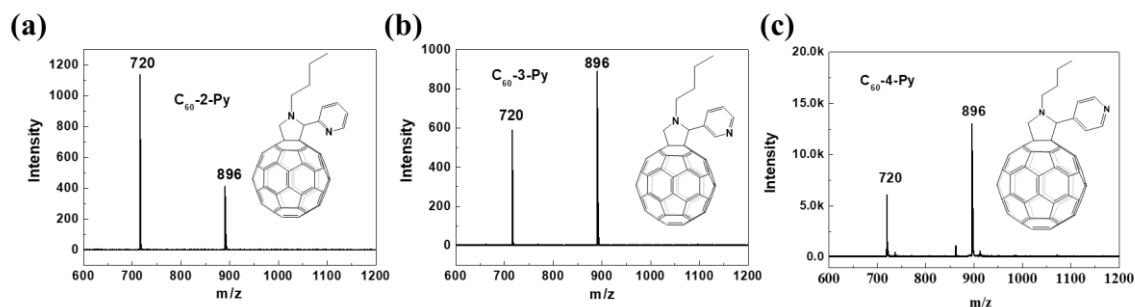

**Figure S1.** MALDI-TOF Mass spectra of (a)  $C_{60}$ -2-Py, (b)  $C_{60}$ -3-Py, (c)  $C_{60}$ -4-Py. (The MALDI-TOF Mass spectra of  $C_{60}$ -4-Py is Cited from the reference S1 we reported previously.)

**S2.  $^1\text{H}$  NMR and  $^{13}\text{C}$  NMR spectra of  $C_{60}$ - $n$ -Py ( $n=2, 3, 4$ ).**

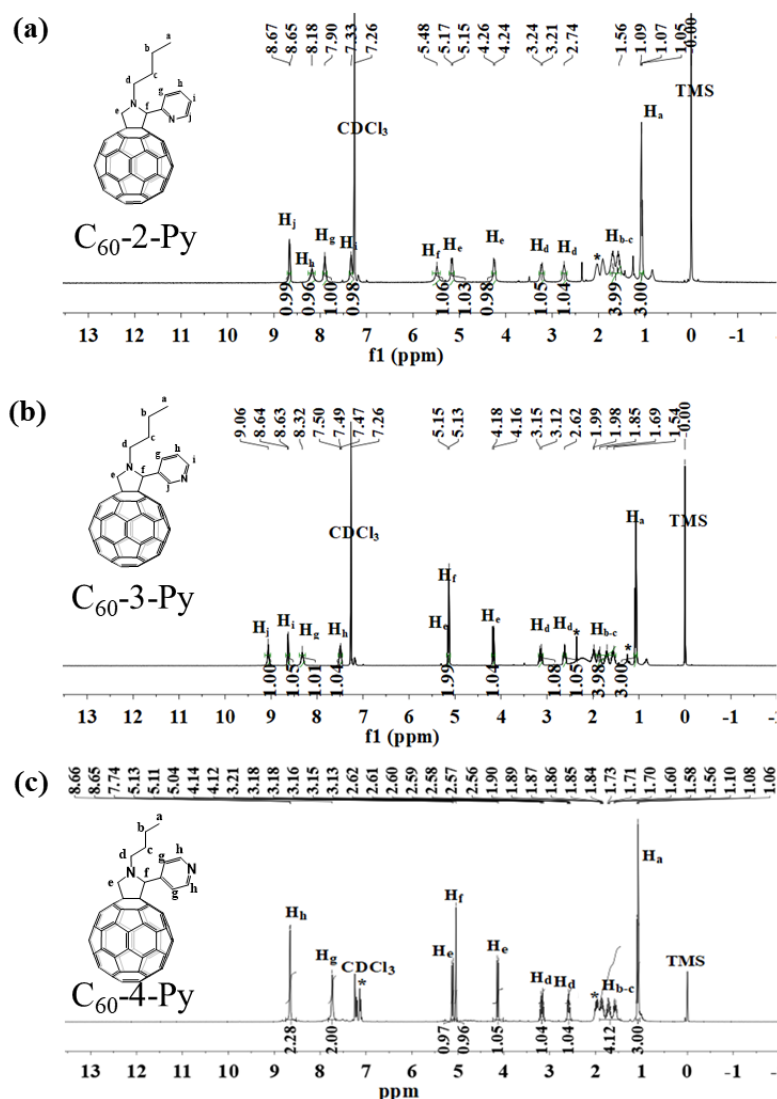

**Figure S2.**  $^1\text{H}$  NMR spectra of (a)  $C_{60}$ -2-Py, (b)  $C_{60}$ -3-Py, (c)  $C_{60}$ -4-Py. (The  $^1\text{H}$  NMR spectra of  $C_{60}$ -4-Py is Cited from the reference S1 we reported previously.)

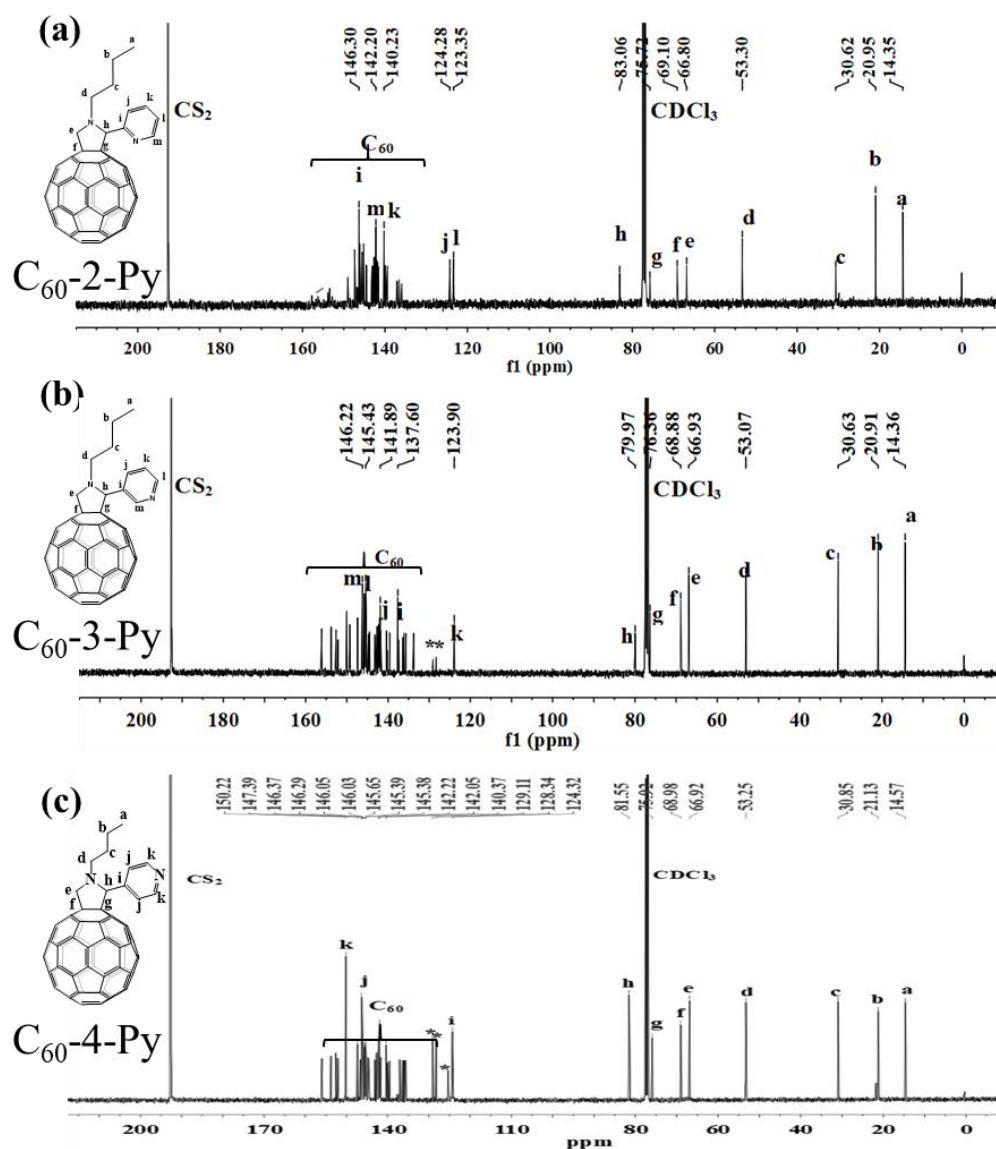

**Figure S3.**  $^{13}\text{C}$  NMR spectra of (a)  $C_{60}$ -2-Py, (b)  $C_{60}$ -3-Py, (c)  $C_{60}$ -4-Py in  $\text{CS}_2/\text{CDCl}_3$ , the peaks at (192.5 ppm) and (77 - 77.7 ppm) represent the signals of solvents of  $\text{CS}_2$  and  $\text{CDCl}_3$ . ( $^{13}\text{C}$  NMR spectra of  $C_{60}$ -4-Py is Cited from the reference S1 we reported previously.)

### S3. FTIR spectra of $C_{60}$ - $n$ -Py ( $n=2, 3, 4$ ).

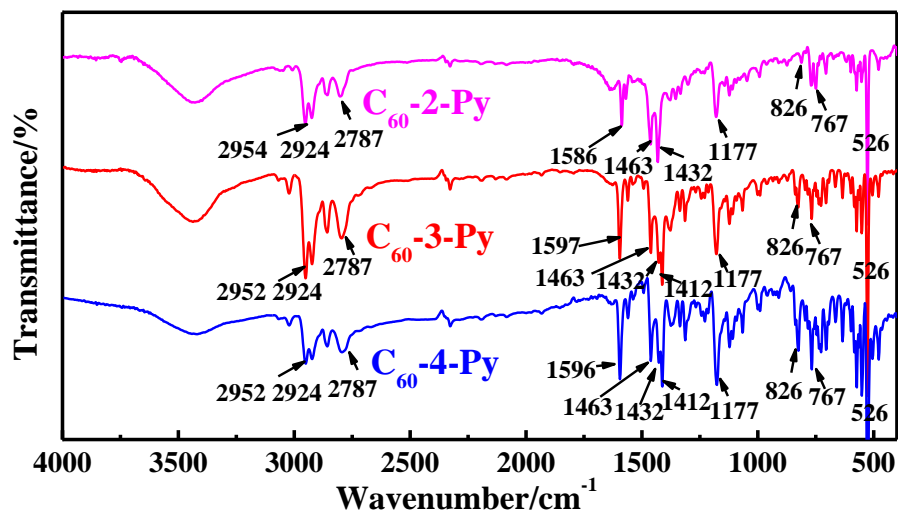

**Figure S4.** FTIR spectra of (a)  $C_{60}$ -2-Py, (b)  $C_{60}$ -3-Py and (c)  $C_{60}$ -4-Py.

### S4. Crystal parameters of $C_{60}$ - $n$ -Py ( $n=2, 3, 4$ ) obtained by X-ray single crystal diffraction.

**Table S1** The crystal parameters of  $C_{60}$ - $n$ -Py ( $n=2, 3, 4$ )

| Crystal                            | $C_{60}$ -2-Py                         | $C_{60}$ -3-Py                         | $C_{60}$ -4-Py                         |
|------------------------------------|----------------------------------------|----------------------------------------|----------------------------------------|
| Formula                            | C192H94.7N21                           | C198H102N22                            | C191H95.06N22                          |
| Formula weight                     | 2695.58                                | 2789.01                                | 2698.51                                |
| Color, habit                       | Black, block                           | Black, block                           | Black, block                           |
| Crystal system                     | monoclinic                             | monoclinic                             | monoclinic                             |
| Space group                        | $P21/c$                                | $P21/c$                                | $P21/c$                                |
| a, Å                               | 14.316                                 | 30.750                                 | 14.3847(9)                             |
| b, Å                               | 32.479                                 | 27.543                                 | 32.4491(19)                            |
| c, Å                               | 28.389                                 | 18.176                                 | 28.3555(17)                            |
| $\alpha$ , deg                     | 90                                     | 90                                     | 90                                     |
| $\beta$ , deg                      | 93.72                                  | 98.29                                  | 93.508(2)                              |
| $\gamma$ , deg                     | 90                                     | 90                                     | 90                                     |
| Volume, Å <sup>3</sup>             | 13172.2                                | 15233.1                                | 13210.7(14)                            |
| Z                                  | 4                                      | 4                                      | 4                                      |
| T, K                               | 173(2)                                 | 173(2)                                 | 173(2)                                 |
| Radiation ( $\lambda$ , Å)         | synchrotron<br>( $\lambda = 0.71073$ ) | synchrotron<br>( $\lambda = 0.71073$ ) | synchrotron<br>( $\lambda = 0.71073$ ) |
| Unique data (Rint)                 | 24647( 0.135)                          | 16807( 0.109)                          | 26894(0.0901)                          |
| Parameters                         | 2460                                   | 2036                                   | 2478                                   |
| Restraints                         | 1554                                   | 1944                                   | 2103                                   |
| Observed data ( $I > 2\sigma(I)$ ) | 24647                                  | 16807                                  | 175410                                 |
| R1 <sup>a</sup> (observed data)    | 0.0967                                 | 0.1137                                 | 0.1500                                 |
| wR2 <sup>b</sup> (all data)        | 0.2730                                 | 0.2791                                 | 0.3818                                 |

**Table S2** The distances of carbon cage-carbon cage and pyridine nitrogen sites-carbon cage

| Crystal                                      | C <sub>60</sub> -2-Py | C <sub>60</sub> -3-Py | C <sub>60</sub> -4-Py |
|----------------------------------------------|-----------------------|-----------------------|-----------------------|
| Distance of carbon cage and carbon cage      | 10.037                | 11.298                | 10.334                |
|                                              | 7.368                 | 9.052                 | 7.292                 |
|                                              | -                     | 9.728                 | -                     |
| Distance of cage and pyridine nitrogen sites | 8.947                 | 7.165                 | 11.919                |

**S5. TGA analysis of C<sub>60</sub>-n-Py (n=2, 3, 4).**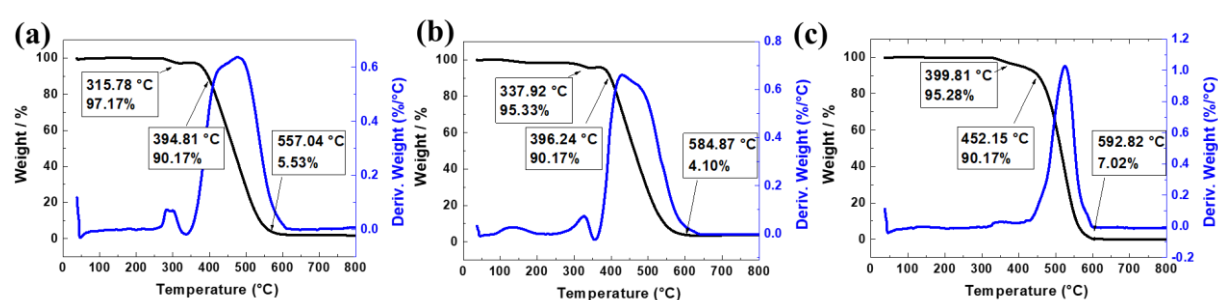**Figure S5.** TGA curves (black lines) and differential thermo-gravimetric (DTG) curve (blue lines) of (a) C<sub>60</sub>-2-Py, (b) C<sub>60</sub>-3-Py, (c) C<sub>60</sub>-4-Py

According to the TGA curves of C<sub>60</sub>-n-Py, the decomposition temperature of the first weight-loss step, which correlates to the detachment of the functional groups of C<sub>60</sub>-n-Py, are 394.81 °C, 396.24 °C and 452.15 °C for C<sub>60</sub>-2-BPy, C<sub>60</sub>-3-BPy and C<sub>60</sub>-4-BPy, respectively, indicating the detachment of functional groups in fullerene derivatives. The second weight-loss step is related to the decomposition of C<sub>60</sub> cage within pyridine-functionalized fullerene derivatives and the corresponding decomposition temperatures are 557.04 °C, 584.87 °C, 592.82 °C, respectively. Such high decomposition temperatures of C<sub>60</sub>-n-BPy ensure their considerable thermal stabilities, fulfilling the requirements of iPSC device fabrication.

### S6. Estimation of the energy levels of C<sub>60</sub>-n-Py (n=2, 3, 4) and PCBM.

**Table S3.** Electrochemical data of C<sub>60</sub>-n-Py (n=2, 3, 4) and PCBM.

|                       | <sup>a</sup><br>$\lambda_{\text{onset}}$<br>(nm) | <sup>b</sup><br>$E_{\text{g,opt}}$<br>(eV) | <sup>c</sup><br>$E_{\text{onset,red}}$<br>(eV) | <sup>d</sup><br>$E_{\text{LUMO}}$<br>(eV) | <sup>e</sup><br>$E_{\text{HOMO}}$<br>(eV) |
|-----------------------|--------------------------------------------------|--------------------------------------------|------------------------------------------------|-------------------------------------------|-------------------------------------------|
| PCBM                  | 724                                              | 1.71                                       | -0.98                                          | -3.82                                     | -5.53                                     |
| C <sub>60</sub> -2-Py | 715                                              | 1.73                                       | -1.02                                          | -3.78                                     | -5.51                                     |
| C <sub>60</sub> -3-Py | 724                                              | 1.71                                       | -1.00                                          | -3.80                                     | -5.51                                     |
| C <sub>60</sub> -4-Py | 724                                              | 1.71                                       | -0.99                                          | -3.81                                     | -5.52                                     |

<sup>a</sup> Attained from UV-vis spectrum; <sup>b</sup>  $E_{\text{g,opt}}=1240/\lambda_{\text{onset}}$ ; <sup>c</sup> Referred to the half wave potential of ferrocene;

<sup>d</sup>  $E_{\text{LUMO}}=-e(E_{\text{onset, red}}+4.8 \text{ V})$ ; <sup>e</sup>  $E_{\text{HOMO}}=E_{\text{LUMO}}-E_{\text{g,opt}}$ .

The energy levels of the lowest unoccupied molecular orbital (LUMO) and highest occupied molecular orbital (HOMO) of the fullerene derivatives were estimated by a cyclic voltammetry study in combination with UV-Vis absorption spectroscopy. Cyclic voltammetry study was performed in *o*-dichlorobenzene with a CHI 630D potentiostat (CHI Instrument, U.S.A.) at room temperature. Tetrabutylammonium perchlorate (TBPA, electrochemical grade, Fluka) was used as the supporting electrolyte was. A standard three-electrode arrangement of a platinum (Pt) wire as counter electrode, a platinum coil as working electrode, and a saturated calomel electrode as a pseudo-reference electrode was used. In a comparison experiment, ferrocene (Fc) was added as the internal standard and all potentials are referred to the Fc<sup>+</sup>/Fc couple.

The onset reduction potentials ( $E_{\text{red}}^{\text{onset}}$ ) of C<sub>60</sub>-2-Py, C<sub>60</sub>-3-Py, C<sub>60</sub>-4-Py and PCBM were estimated to be -1.02, -1.00, -0.99 and -0.98 V vs Fc<sup>+</sup>/Fc, respectively. Hence, the LUMO energy levels of C<sub>60</sub>-2-Py, C<sub>60</sub>-3-Py, C<sub>60</sub>-4-Py and PCBM are -5.51, -5.51, -5.52 and -5.53 eV calculated by  $E_{\text{LUMO}}=-e(E_{\text{red}}^{\text{onset}}+4.8)$ , respectively. The HOMO energy level of C<sub>60</sub>-2-Py, C<sub>60</sub>-3-Py, C<sub>60</sub>-4-Py and PCBM are calculated by  $E_{\text{HOMO}}=E_{\text{g}}^{\text{opt}}-E_{\text{LUMO}}$ ,<sup>S2, S3</sup> where  $E_{\text{g}}^{\text{opt}}$  is the optical bandgap. Based on the onset ( $\lambda_{\text{onset}}$ ) of UV-vis absorption spectrum of C<sub>60</sub>-2-Py, C<sub>60</sub>-3-Py, C<sub>60</sub>-4-Py and PCBM (~715, ~724, ~724, ~724 nm, see Fig. 1b. ),  $E_{\text{g}}^{\text{opt}}$  is estimated to be ~1.73, 1.71, 1.71 and 1.71 eV, respectively, according to the equation:  $E_{\text{g}}^{\text{opt}}=1240/\lambda_{\text{onset}}$ .<sup>S4, S5</sup> A small blue shift of  $\lambda_{\text{onset}}$  is observed for C<sub>60</sub>-2-Py, which is likely due to the different intramolecular charge transfer between C<sub>60</sub> cage and the pyridine moiety. However, such a small blue shift of  $\lambda_{\text{onset}}$  results in only negligible influence on the  $E_{\text{g}}^{\text{opt}}$ . Accordingly, the HOMO energy levels of C<sub>60</sub>-2-Py, C<sub>60</sub>-3-Py, C<sub>60</sub>-4-Py and PCBM are estimated to be -5.51, -5.51, -5.52 and -5.53 eV, respectively.

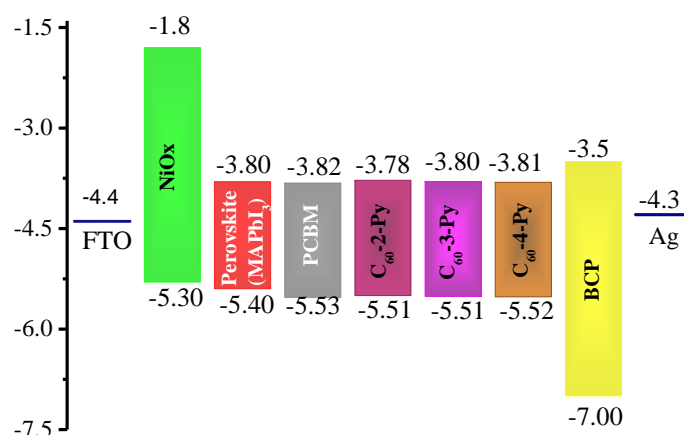

**Figure S6.** The energy level diagram of the materials used in the perovskite solar cells

**S7. Photovoltaic parameters of devices using different C<sub>60</sub>-n-Py (n=2, 3, 4) as ETL deposited with the same procedure.**

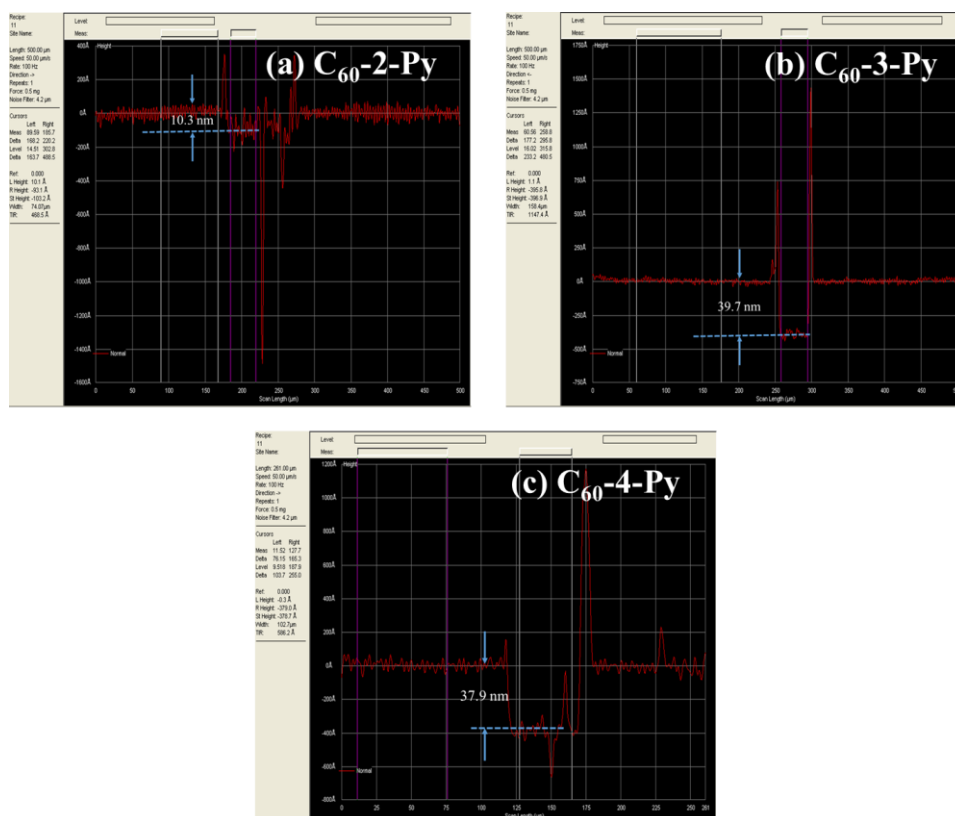

**Figure S7.** Figure S7 Surface profiles of (a) C<sub>60</sub>-2-Py, (b) C<sub>60</sub>-3-Py (c) C<sub>60</sub>-4-Py ETLs measured on KLA-Tencor P6 surface profilometer under the optimized solution concentration and pin-coating speed.



**Table S4.** Photovoltaic parameters of devices with different  $C_{60}$ -n-Py (n=2, 3, 4) ETLs deposited at the same concentration (9 mg/ml in CB) and the same spin-coating speed. The parameters were averaged by over 10 devices fabricated independently.

| ETL            | Spin-coating speed | $V_{oc}$ (V)    | $J_{sc}$ ( $mA/cm^2$ ) | FF (%)           | PCE (%)          | $R_s$ ( $\Omega \cdot cm^2$ ) | $R_{sh}$ ( $\Omega \cdot cm^2$ ) |
|----------------|--------------------|-----------------|------------------------|------------------|------------------|-------------------------------|----------------------------------|
| $C_{60}$ -2-Py | 1000 rpm           | $0.97 \pm 0.03$ | $18.24 \pm 1.99$       | $56.76 \pm 4.87$ | $10.01 \pm 1.72$ | 9.1                           | 807.5                            |
|                | 3000 rpm           | $0.92 \pm 0.01$ | $13.67 \pm 1.01$       | $51.03 \pm 3.24$ | $6.44 \pm 0.86$  | 13.8                          | 460.2                            |
| $C_{60}$ -3-Py | 1000 rpm           | $0.97 \pm 0.01$ | $22.07 \pm 0.72$       | $66.12 \pm 0.83$ | $14.20 \pm 0.41$ | 5.5                           | 1541.4                           |
|                | 3000 rpm           | $0.98 \pm 0.02$ | $21.43 \pm 0.94$       | $56.77 \pm 2.81$ | $12.00 \pm 1.06$ | 7.3                           | 1419.0                           |
| $C_{60}$ -4-Py | 1000 rpm           | $0.97 \pm 0.02$ | $21.30 \pm 1.05$       | $64.25 \pm 0.65$ | $13.29 \pm 0.72$ | 6.1                           | 1483.3                           |
|                | 3000 rpm           | $0.95 \pm 0.01$ | $20.23 \pm 2.42$       | $53.94 \pm 3.79$ | $10.41 \pm 1.98$ | 8.4                           | 857.4                            |

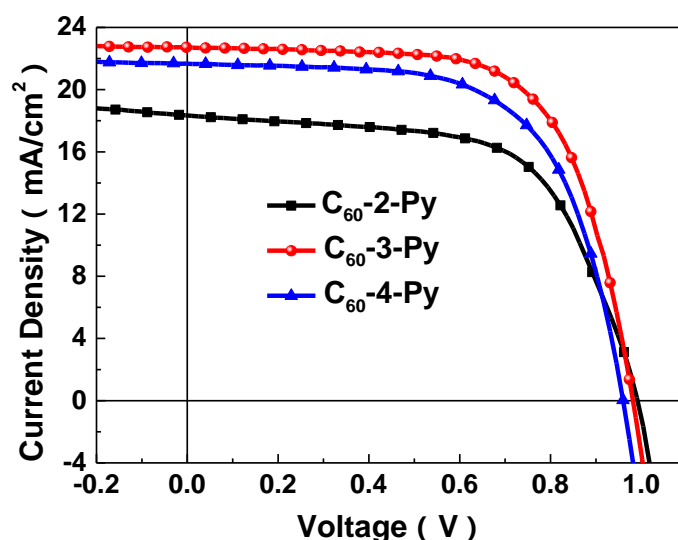

**Figure S8.** The J-V curves of the devices with  $C_{60}$ -2-Py,  $C_{60}$ -3-Py, and  $C_{60}$ -4-Py as electron transport layers (ETLs) deposited at the same concentration (9 mg/ml in CB) and the same spin-coating speed. The scanning direction is from open-circuit voltage to short circuit (reverse).

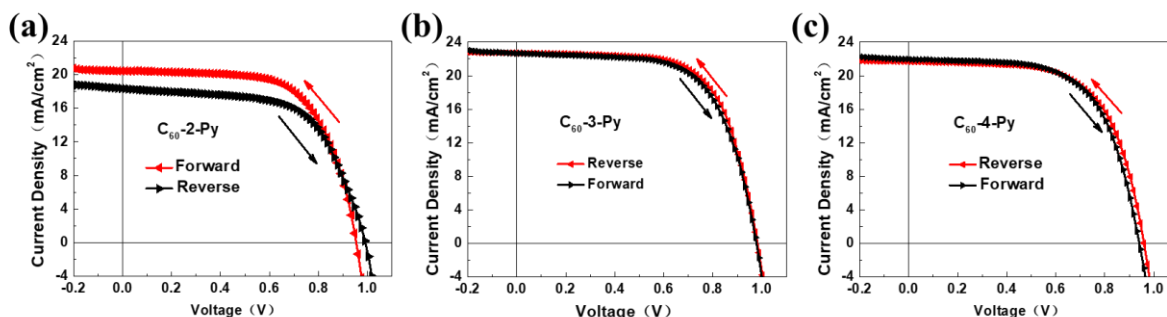

**Figure S9.** The J-V curves of the best performance devices using (a) C<sub>60</sub>-2-Py, (b) C<sub>60</sub>-3-Py and (c) C<sub>60</sub>-4-Py (9 mg/ml in CB, spin-coating speed 1000rpm) as ETLs in different scan direction. Inset shows the photovoltaic parameters and hysteresis index.

**Table S5.** Photovoltaic parameters and hysteresis index of the best performance devices using (a) C<sub>60</sub>-2-Py, (b) C<sub>60</sub>-3-Py and (c) C<sub>60</sub>-4-Py (9 mg/ml in CB, spin-coating speed 1000rpm) as electron transporting layers in different scan direction.

| ETL                   | Scanning direction | V <sub>oc</sub> (V) | J <sub>sc</sub> (mA/cm <sup>2</sup> ) | FF(%) | PCE(%) | Hysteresis index <sup>a</sup> (%) |
|-----------------------|--------------------|---------------------|---------------------------------------|-------|--------|-----------------------------------|
| C <sub>60</sub> -2-Py | Reverse            | 0.95                | 20.45                                 | 64.67 | 12.68  | 10.65                             |
|                       | Forward            | 0.99                | 18.36                                 | 62.41 | 11.33  |                                   |
| C <sub>60</sub> -3-Py | Reverse            | 0.98                | 22.70                                 | 66.38 | 14.78  | 2.71                              |
|                       | Forward            | 0.98                | 22.70                                 | 64.84 | 14.38  |                                   |
| C <sub>60</sub> -4-Py | Reverse            | 0.96                | 21.66                                 | 63.84 | 13.27  | 6.41                              |
|                       | Forward            | 0.96                | 21.88                                 | 59.22 | 12.42  |                                   |

<sup>a</sup> Hysteresis index = [PCE(reverse) - PCE(forward)]/PCE(reverse)

#### S8. Optimization of the film thickness of C<sub>60</sub>-3-Py, C<sub>60</sub>-4-Py ETL.

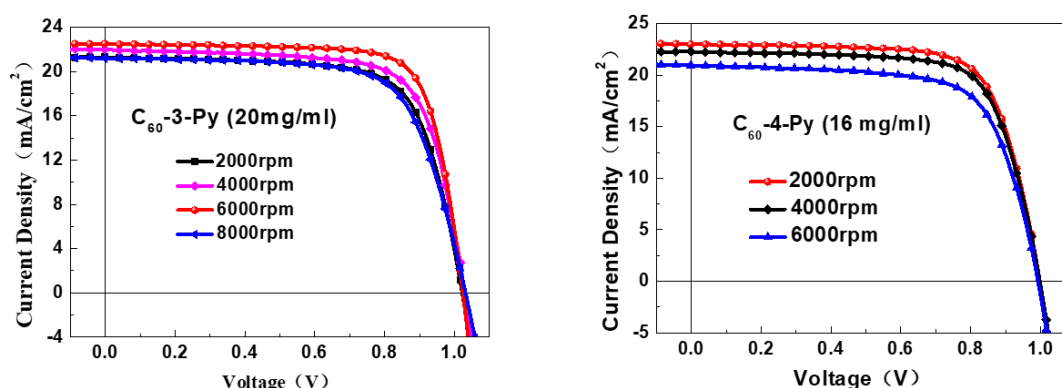

**Figure S10.** J-V curves of (a) C<sub>60</sub>-3-Py, (b) C<sub>60</sub>-4-Py-based devices produced by different spin-coating speed with certain concentrations in chlorobenzene.

**Table S6.** Photovoltaic parameters of devices with different C<sub>60</sub>-n-Py (n=2, 3, 4) ETLs deposited by different spin-coating rate. The parameters were averaged by over 5 devices fabricated independently.

| ETL                   | concentration | Spin-coating speed | V <sub>oc</sub> (V) | J <sub>sc</sub> (mA/cm <sup>2</sup> ) | FF(%)      | PCE(%)     |
|-----------------------|---------------|--------------------|---------------------|---------------------------------------|------------|------------|
| C <sub>60</sub> -2-Py | 9 mg/ml       | 1000rpm            | 0.97±0.03           | 18.24±1.99                            | 56.76±4.87 | 10.01±1.72 |
|                       |               | 3000rpm            | 0.92±0.01           | 13.67±1.01                            | 51.03±3.24 | 6.44±0.86  |
| C <sub>60</sub> -3-Py | 20 mg/ml      | 2000rpm            | 1.00±0.01           | 21.09±0.84                            | 71.35±1.40 | 15.07±0.43 |
|                       |               | 4000rpm            | 1.02±0.01           | 21.39±0.58                            | 73.24±1.45 | 15.96±0.80 |
|                       |               | 6000rpm            | 1.02±0.01           | 21.99±0.92                            | 74.33±1.64 | 16.73±0.60 |
|                       |               | 8000rpm            | 1.00±0.01           | 21.68±0.58                            | 68.76±0.77 | 14.81±0.46 |
| C <sub>60</sub> -4-Py | 16 mg/ml      | 2000rpm            | 1.00±0.004          | 21.59±0.54                            | 73.02±0.57 | 15.57±0.46 |
|                       |               | 4000rpm            | 1.00±0.001          | 21.18±0.74                            | 71.12±1.76 | 15.53±0.84 |
|                       |               | 6000rpm            | 1.00±0.016          | 19.76±0.42                            | 69.34±2.68 | 13.66±0.36 |

**S9. Statistic photovoltaic parameters for C<sub>60</sub>-n-Py (n=2, 3, 4) and PCBM-based devices.**

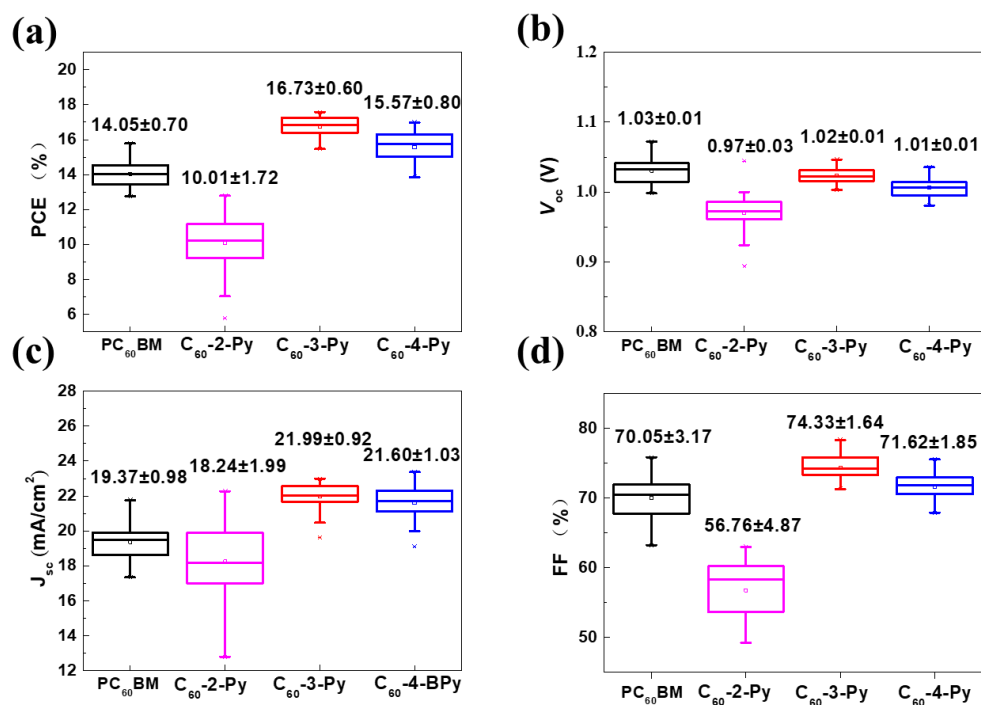

**Figure S11.** Box plots of PCE (a), V<sub>oc</sub> (b), J<sub>sc</sub> (c) and FF (d) for the PCBM and C<sub>60</sub>-n-Py based devices.

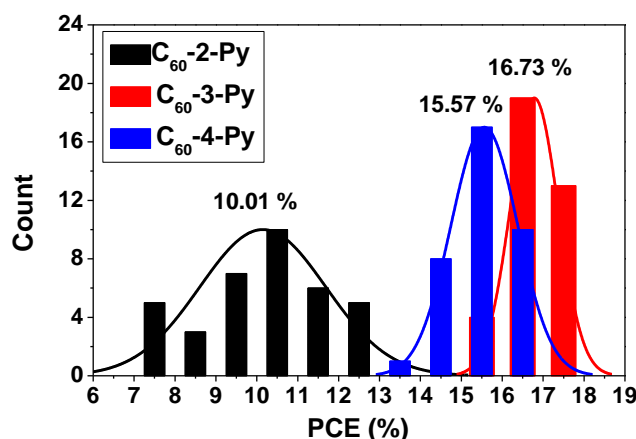

**Figure S12.** PCE histograms of the C<sub>60</sub>-n-Py (n=2, 3, 4)-based devices.

### S10. Photovoltaic parameters of devices with fullerene derivative ETLs in different scan directions.

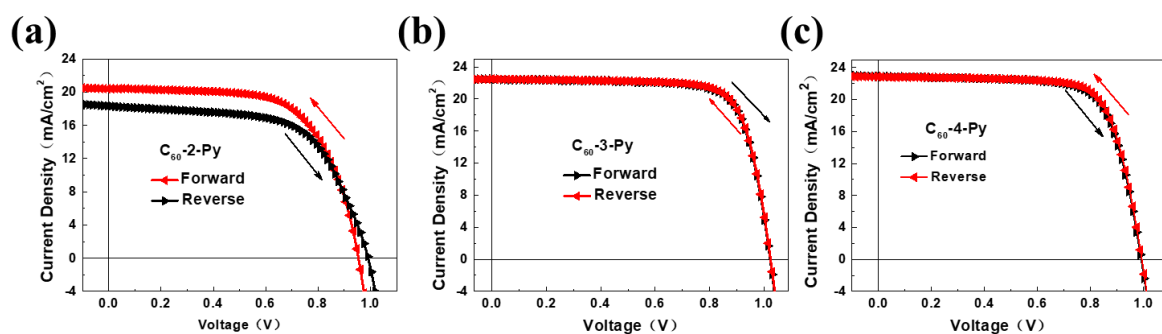

**Figure S13.** The J-V curves of the best performance devices using different fullerene derivative, (a) C<sub>60</sub>-2-Py, (b) C<sub>60</sub>-3-Py, (c) C<sub>60</sub>-4-Py as ETLs in different scan direction.

**Table S7.** Photovoltaic parameters of of best performance devices using C<sub>60</sub>-2-Py, C<sub>60</sub>-3-Py and C<sub>60</sub>-4-Py as ETLs under forward and reverse scans.

| ETL                   | Scanning direction | V <sub>oc</sub> (V) | J <sub>sc</sub> (mA/cm <sup>2</sup> ) | FF(%) | PCE(%) | Hysteresis index <sup>a</sup> (%) |
|-----------------------|--------------------|---------------------|---------------------------------------|-------|--------|-----------------------------------|
| C <sub>60</sub> -2-Py | Reverse            | 0.95                | 20.45                                 | 64.67 | 12.68  | 10.65                             |
|                       | Forward            | 0.99                | 18.36                                 | 62.41 | 11.33  |                                   |
| C <sub>60</sub> -3-Py | Reverse            | 1.02                | 22.46                                 | 76.42 | 17.57  | 0.46                              |
|                       | Forward            | 1.02                | 22.47                                 | 76.20 | 17.49  |                                   |
| C <sub>60</sub> -4-Py | Reverse            | 1.00                | 22.85                                 | 74.20 | 16.83  | 1.37                              |
|                       | Forward            | 1.00                | 22.93                                 | 73.09 | 16.60  |                                   |

<sup>a</sup> Hysteresis index = [PCE(reverse) - PCE(forward)]/PCE(reverse)

**S11. AFM height images of perovskite films modified by  $C_{60}$ - $n$ -Py ( $n=2, 3, 4$ ) and PCBM.**

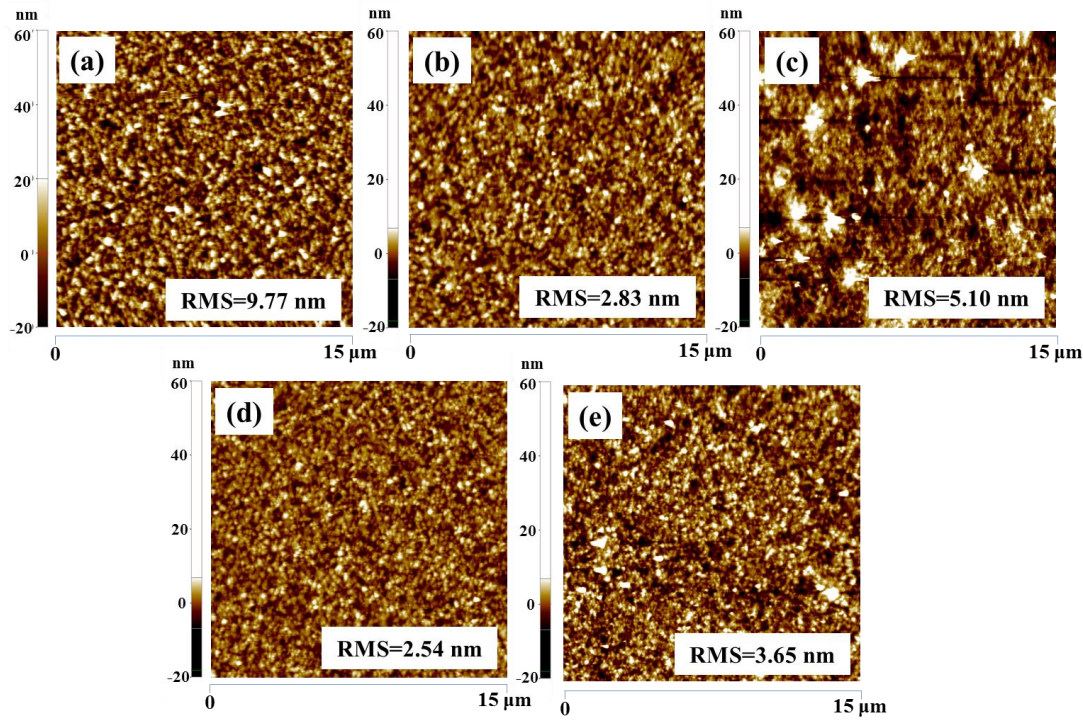

**Figure S14.** AFM height images ( $15\mu\text{m} \times 15\mu\text{m}$ ) of (a) FTO/NiO<sub>x</sub>/CH<sub>3</sub>NH<sub>3</sub>PbI<sub>3</sub>, (b) FTO/NiO<sub>x</sub>/CH<sub>3</sub>NH<sub>3</sub>PbI<sub>3</sub>/PCBM, (c) FTO/NiO<sub>x</sub>/CH<sub>3</sub>NH<sub>3</sub>PbI<sub>3</sub>/C<sub>60</sub>-2-Py, (d) FTO/NiO<sub>x</sub>/CH<sub>3</sub>NH<sub>3</sub>PbI<sub>3</sub>/C<sub>60</sub>-3-Py, (e) FTO/NiO<sub>x</sub>/CH<sub>3</sub>NH<sub>3</sub>PbI<sub>3</sub>/C<sub>60</sub>-4-Py films.

**S12. Analysis of time-resolved photoluminescence (TRPL) spectra of the perovskite film with  $C_{60}$ - $n$ -Py ( $n=2, 3, 4$ ) and PCBM ETLs.**

To further explore the charge recombination dynamics, TRPL spectra of perovskite film w/o  $C_{60}$ - $n$ -Py ( $n=2, 3, 4$ ) and PCBM as ETLs are measured (Figure 4b). The lifetime was obtained by fitting the TRPL spectra by a bi-exponential decay function as shown in equation S1.<sup>S6-S8</sup>

$$F(t) = A_1 \exp(-t/\tau_1) + A_2 \exp(-t/\tau_2) + y_0 \quad (\text{S1})$$

Where  $A_1$  and  $A_2$  are the decay amplitude, the decay lifetime  $\tau_1$  and  $\tau_2$  are the fast and slow decay time,  $y_0$  is a constant for the baseline offset, respectively. The fast decay is considered to be the result of quenching of free charges in perovskite film through transport to the electron transport layers, while the slow decay is to be the result of nonradiative recombination of trapped charges within CH<sub>3</sub>NH<sub>3</sub>PbI<sub>3</sub> perovskite film. We calculated the average decay time ( $\tau_{\text{ave}}$ ) according to the formula  $\tau_{\text{ave}} = (A_1\tau_1^2 + A_2\tau_2^2) / (A_1\tau_1 + A_2\tau_2)$ . The pristine CH<sub>3</sub>NH<sub>3</sub>PbI<sub>3</sub> perovskite film shows a  $\tau_{\text{ave}}$  of 22.63 ns. The C<sub>60</sub>-2-Py, C<sub>60</sub>-3-Py, C<sub>60</sub>-4-Py and PCBM based films show average lifetime of 18.17 ns, 9.16 ns, 4.63 ns and 7.91 ns respectively, which demonstrated that C<sub>60</sub>-3-Py are the most efficient electron acceptor for CH<sub>3</sub>NH<sub>3</sub>PbI<sub>3</sub> perovskite film.

***S13. Trap state densities of perovskite films with C<sub>60</sub>-n-Py (n=2, 3, 4) and PCBM ETLs measured by SCLC method.***

Electron-only devices with a structure of ITO/TiO<sub>2</sub>/perovskite/ETL/Ag was fabricated to measure the trap state density of CH<sub>3</sub>NH<sub>3</sub>PbI<sub>3</sub> perovskite film deposited with different C<sub>60</sub>-n-Py (n=2, 3, 4) and PCBM. The J-V curves of these devices measured under dark condition are shown in Figure 4c. As can be seen, an ohmic response is emerged at the low bias, where the J-V curve exhibits linear  $V \propto$  correlation. With bias voltage increases, the current increases nonlinearly, which indexes as trap-filled limit region ( $I \propto V^{n>3}$ ). The kink point between ohmic regime and trap-filled limit region is defined as the trap-filled limit voltage ( $V_{TFL}$ ). Trap-state density ( $n_t$ ) can be determined through equation as follow:

$$n_t = \frac{2\varepsilon\varepsilon_0}{eL^2} \cdot V_{TFL} \quad (S2)$$

Where  $\varepsilon$  is the relative dielectric constant of CH<sub>3</sub>NH<sub>3</sub>PbI<sub>3</sub> (28.8),  $\varepsilon_0$  is the vacuum permittivity ( $\varepsilon_0 = 8.854 \times 10^{-12}$  F/m),  $e$  is the elementary charge of the electron ( $e = 1.6 \times 10^{-19}$  C), and  $L$  is the perovskite film thickness (~300nm). The  $V_{TFL}$  of the CH<sub>3</sub>NH<sub>3</sub>PbI<sub>3</sub> perovskite films after deposited with C<sub>60</sub>-2-Py, C<sub>60</sub>-3-Py C<sub>60</sub>-4-Py and PCBM are 0.831 V, 0.589 V, 0.633 V and 0.769 V, corresponding to  $n_t$  of  $2.946 \times 10^{16}$  cm<sup>-3</sup>,  $2.088 \times 10^{16}$  cm<sup>-3</sup>,  $2.243 \times 10^{16}$  and  $2.762 \times 10^{16}$  cm<sup>-3</sup>.

*S14. Electron mobilities of CH<sub>3</sub>NH<sub>3</sub>PbI<sub>3</sub> films with C<sub>60</sub>-n-Py (n=2, 3, 4) and PCBM ETLs estimated by SCLC method.*

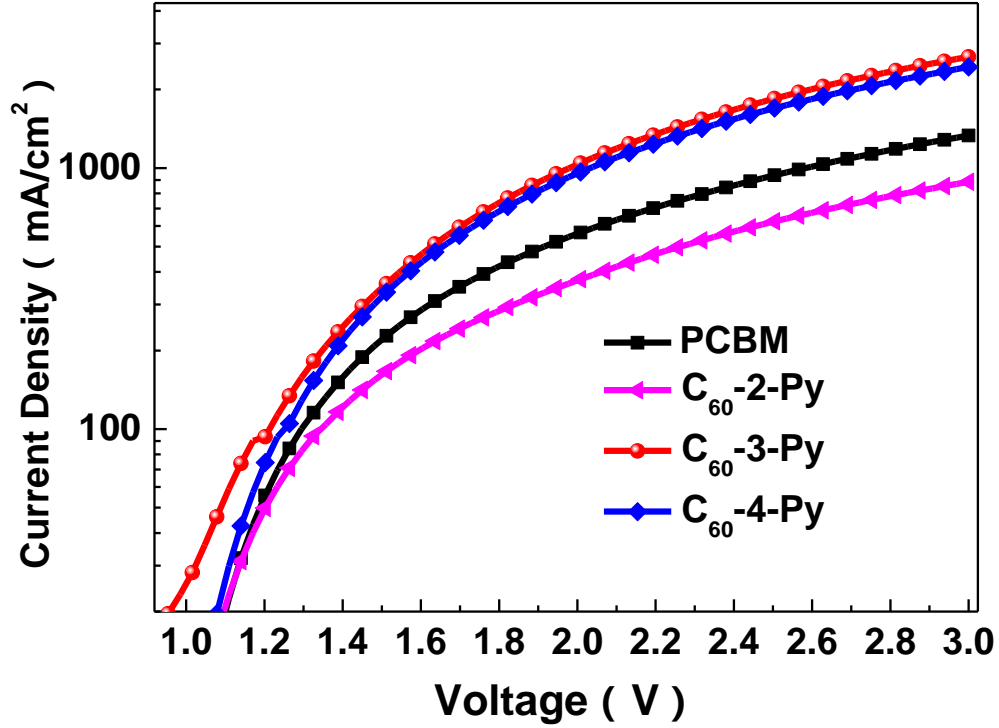

**Figure S15.** Current-voltage data from the electron-only devices using C<sub>60</sub>-n-Py (n=2, 3, 4) and PCBM as ETL. The device architecture is ITO/ CH<sub>3</sub>NH<sub>3</sub>PbI<sub>3</sub>/ETL/Ag.

The electron mobility of CH<sub>3</sub>NH<sub>3</sub>PbI<sub>3</sub> films with different fullerene derivatives is estimated by SCLC method. The  $\mu$  value is calculated from the Mott–Gurney equation:

$$J_d = \frac{9\varepsilon\varepsilon_0}{8L^3} \cdot V^2 \cdot \mu \quad (\text{S3})$$

Where the  $J_d$  is current density and  $\mu$  is carrier mobility,  $L$  is the thickness of the CH<sub>3</sub>NH<sub>3</sub>PbI<sub>3</sub> film (300 nm). According to equation (S3), the electron mobility of C<sub>60</sub>-2-Py, C<sub>60</sub>-3-Py C<sub>60</sub>-4-Py and PCBM based device is  $1.02 \times 10^{-3} \text{ cm}^2\text{V}^{-1}\text{S}^{-1}$ ,  $2.95 \times 10^{-3} \text{ cm}^2\text{V}^{-1}\text{S}^{-1}$  and  $2.64 \times 10^{-3} \text{ cm}^2\text{V}^{-1}\text{S}^{-1}$ ,  $1.44 \times 10^{-4} \text{ cm}^2\text{V}^{-1}\text{S}^{-1}$ .



### S15. Parameters employed for the fitting of impedance spectra.

From the Nyquist plot (Figure 4d), we fitted the impedance spectra with one R-CPE arcs, which a resistor  $R_s$  (series resistance) and parallel with an R-CPE elements.  $R_s$  is determined by the starting point at the real part of the Nyquist plot. The  $R_{ct}$  (charge transfer resistance) is associated with the charge transfer process at the perovskite/ETL interface, CPE is the non-ideal chemical capacitances.

**Table S8.** Parameters employed for the fitting of impedance spectra.

| ETL                       | $R_s (\Omega \cdot \text{cm}^2)$ | $R_{ct} (\Omega \cdot \text{cm}^2)$ | CPE-T ( $\text{F}/\text{cm}^2$ ) | CPE-P  |
|---------------------------|----------------------------------|-------------------------------------|----------------------------------|--------|
| $\text{PC}_{61}\text{BM}$ | 19.46                            | 308.5                               | 4.19E-08                         | 0.8931 |
| $\text{C}_{60}$ -2-Py     | 17.84                            | 511.6                               | 7.14E-08                         | 0.8612 |
| $\text{C}_{60}$ -3-Py     | 19.85                            | 53.2                                | 5.45E-08                         | 0.9040 |
| $\text{C}_{60}$ -4-Py     | 16.62                            | 178.5                               | 7.28E-08                         | 0.8829 |

### S16. Stabilized photocurrent density and power output of the $\text{C}_{60}$ - $n$ -Py-based ( $n=2, 3, 4$ ) devices.

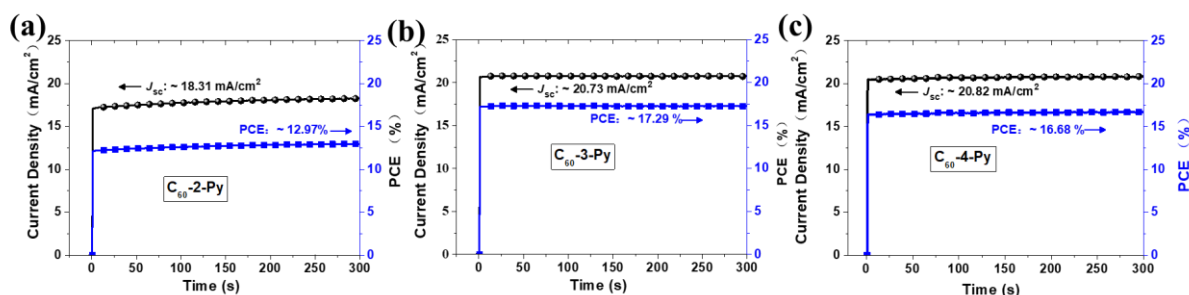

**Figure S16.** Stabilized photocurrent and power output of devices using (a)  $\text{C}_{60}$ -2-Py, (b)  $\text{C}_{60}$ -3-Py, (c)  $\text{C}_{60}$ -4-Py as ETLs measured at the maximum power points. (0.710 V, 0.832 V and 0.801 V for  $\text{C}_{60}$ -2-Py-,  $\text{C}_{60}$ -3-Py- and  $\text{C}_{60}$ -4-Py-based devices respectively.)

### S17. Wettabilities of $\text{C}_{60}$ - $n$ -Py ( $n=2, 3, 4$ ) films.

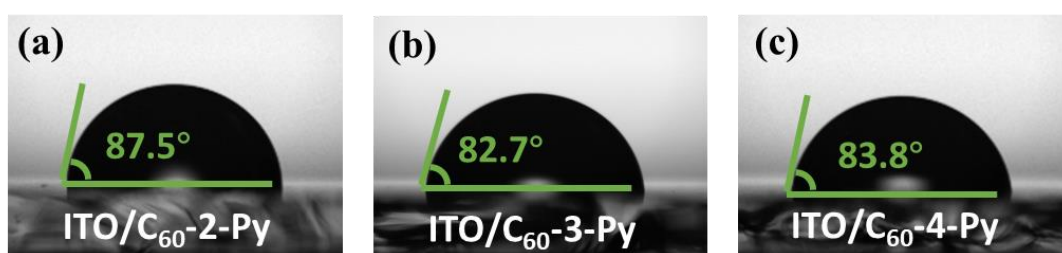

**Figure S17.** Water contact angles on (a) ITO/ $\text{C}_{60}$ -2-Py, (b) ITO/ $\text{C}_{60}$ -3-Py, (c) ITO/ $\text{C}_{60}$ -4-Py films.



**S18. Device fabrication procedure and photovoltaic parameters of the  $\text{Cs}_{0.05}\text{FA}_{0.83}\text{MA}_{0.12}\text{PbI}_{2.55}\text{Br}_{0.45}$  iPSCs with  $\text{C}_{60}\text{-n-Py}$  (n=2, 3, 4) and PCBM ETLs**

For CsFAMA iPSC devices fabrication, PTAA HTL was spin-coated on the precleaned substrate at 4000 rpm for 30s from a solution of 2mg/ml in toluene. The PTAA film were annealed at 100°C for 10 min. Next, CsFAMA perovskite precursor solution (1.3 M dissolved in DMSO and DMF with a volume ratio of 2:8, with a molar ratios of  $\text{PbI}_2/\text{PbBr}_2=1.1:0.2$ ,  $\text{FAI}:\text{MABr}=1:0.2$ ,  $\text{CsI}/(\text{FAI}+\text{MABr})=0.05:0.95$ ,  $\text{PbI}_2/\text{FAI}=1.1:1$ ,  $\text{PbBr}_2:\text{MABr}=1:0.2$ ) was spin-coated onto PTAA HTL with a two-step procedure. The first step was 2000 rpm for 10 s with an acceleration of 200 rpm. The second step was 6000 rpm for 30s with a acceleration of 2000 rpm. At 15 s before the end of the sencond procedure, 100  $\mu\text{L}$  CB was dropped on the spinning substrate. The substrate was then immediately transferred on a hotplate and heated at 100 °C for 60 min. The depositon procedures of ETLs, BCP and Ag electrode are the same as  $\text{MAPbI}_3$  iPSC devices.

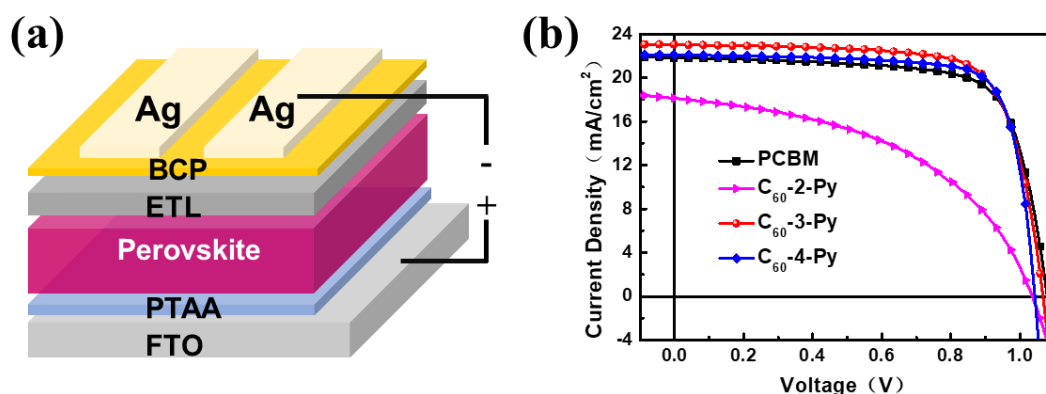

**Figure S18.** (a) Device structure of the  $\text{Cs}_{0.05}\text{FA}_{0.83}\text{MA}_{0.12}\text{PbI}_{2.55}\text{Br}_{0.45}$  based iPSC with  $\text{C}_{60}\text{-n-Py}$  (n=2, 3, 4) and PCBM as ETLs. (b) J-V curves of the champion device based on defferent ETL measured under illumination of an AM 1.5 solar simulator (100  $\text{mW cm}^{-2}$ ) in air. The scanning direction is from open-circuit voltage to short circuit (reverse).

**Table S9.** Photovoltaic parameters of the Cs<sub>0.05</sub>FA<sub>0.83</sub>MA<sub>0.12</sub>PbI<sub>2.55</sub>Br<sub>0.45</sub> iPSCs with C<sub>60</sub>-n-Py (n=2, 3, 4) and PCBM ETLs under one sun illumination (AM 1.5G, 100 mA cm<sup>-2</sup>)

| device   | ETL                   | $V_{oc}$ (V) | $J_{sc}$ (mA/cm <sup>2</sup> ) | FF (%)       | PCE (%)              |       | $R_s^b$<br>( $\Omega \cdot cm^2$ ) | $R_{sh}^b$<br>( $\Omega \cdot cm^2$ ) |
|----------|-----------------------|--------------|--------------------------------|--------------|----------------------|-------|------------------------------------|---------------------------------------|
|          |                       |              |                                |              | Average <sup>a</sup> | Best  |                                    |                                       |
| <b>A</b> | PCBM                  | 1.06 ± 0.02  | 20.96 ± 0.74                   | 69.42 ± 3.60 | 15.53 ± 1.27         | 17.35 | 5.4                                | 1094.6                                |
| <b>B</b> | C <sub>60</sub> -2-Py | 1.05 ± 0.02  | 18.61 ± 1.73                   | 42.56 ± 5.33 | 8.44 ± 1.70          | 10.07 | 17.4                               | 226.1                                 |
| <b>C</b> | C <sub>60</sub> -3-Py | 1.05 ± 0.02  | 22.84 ± 0.63                   | 72.26 ± 2.36 | 17.32 ± 1.02         | 18.65 | 4.4                                | 1945.6                                |
| <b>D</b> | C <sub>60</sub> -4-Py | 1.04 ± 0.03  | 22.10 ± 0.68                   | 71.86 ± 4.25 | 16.52 ± 1.18         | 17.91 | 4.4                                | 1512.9                                |

<sup>a</sup>Averaged over 10 devices fabricated independently. <sup>b</sup>  $R_s$  and  $R_{sh}$  are obtained by the PCE measurement system.

## Reference

- S1 B. Li, J. Zhen, Y. Wan, X. Lei, Q. Liu, Y. Liu, L. Jia, X. Wu, H. Zeng, W. Zhang, G. W. Wang, M. Chen and S. Yang, *ACS Appl. Mater. Interfaces*, 2018, **10**, 32471.
- S2 H. Wang, W. Zhang, C. Xu, X. Bi, B. Chen and S. Yang, *ACS Appl. Mater. Interfaces*, 2013, **5**, 26.
- S3 N. Li, C. J. Brabec, *Energy Environ. Sci.*, 2015, **8**, 2902.
- S4 M. Wang, X. Hu, P. Liu, W. Li, X. Gong, F. Huang and Y. Cao, *J. Am. Chem. Soc.*, 2011, **133**, 9638.
- S5 N. Wang, L. Sun, X. Zhang, X. Bao, W. Zheng and R. Yang, *RSC Advances*, 2014, **4**, 25886.
- S6 Y. Lin, L. Shen, J. Dai, Y. Deng, Y. Wu, Y. Bai, X. Zheng, J. Wang, Y. Fang, H. Wei, W. Ma, X. C. Zeng, X. Zhan and J. Huang, *Adv. Mater.*, 2017, **29**, 1604545.
- S7 P. W. Liang, C. Y. Liao, C. C. Chueh, F. Zuo, S. T. Williams, X. K. Xin, J. Lin and A. K. Jen, *Adv. Mater.* 2014, **26**, 3748.
- S8 J. W. Jung, C.-C. Chueh and A. K. Y. Jen, *Adv. Energy Mater.* 2015, **5**, 1500486.
